# Supplementary material for: Ergebnisse einer deutschlandweiten Weiterbildungsbefragung in der Kinder- und Jugendmedizin – „Das System sieht gar nicht vor, dass Zeit geopfert wird für Weiterbildung“
Source: Springer Nature journal article supplement (doi:10.1007/s00112-024-01947-3), 2024-03-18

## Anhang 1: Weitere Ergebnisse – Subgruppenanalysen

Abbildung 1a: Gründe für die Unzufriedenheit mit der aktuellen beruflichen Situation nach Versorgungsstufe des Krankenhauses

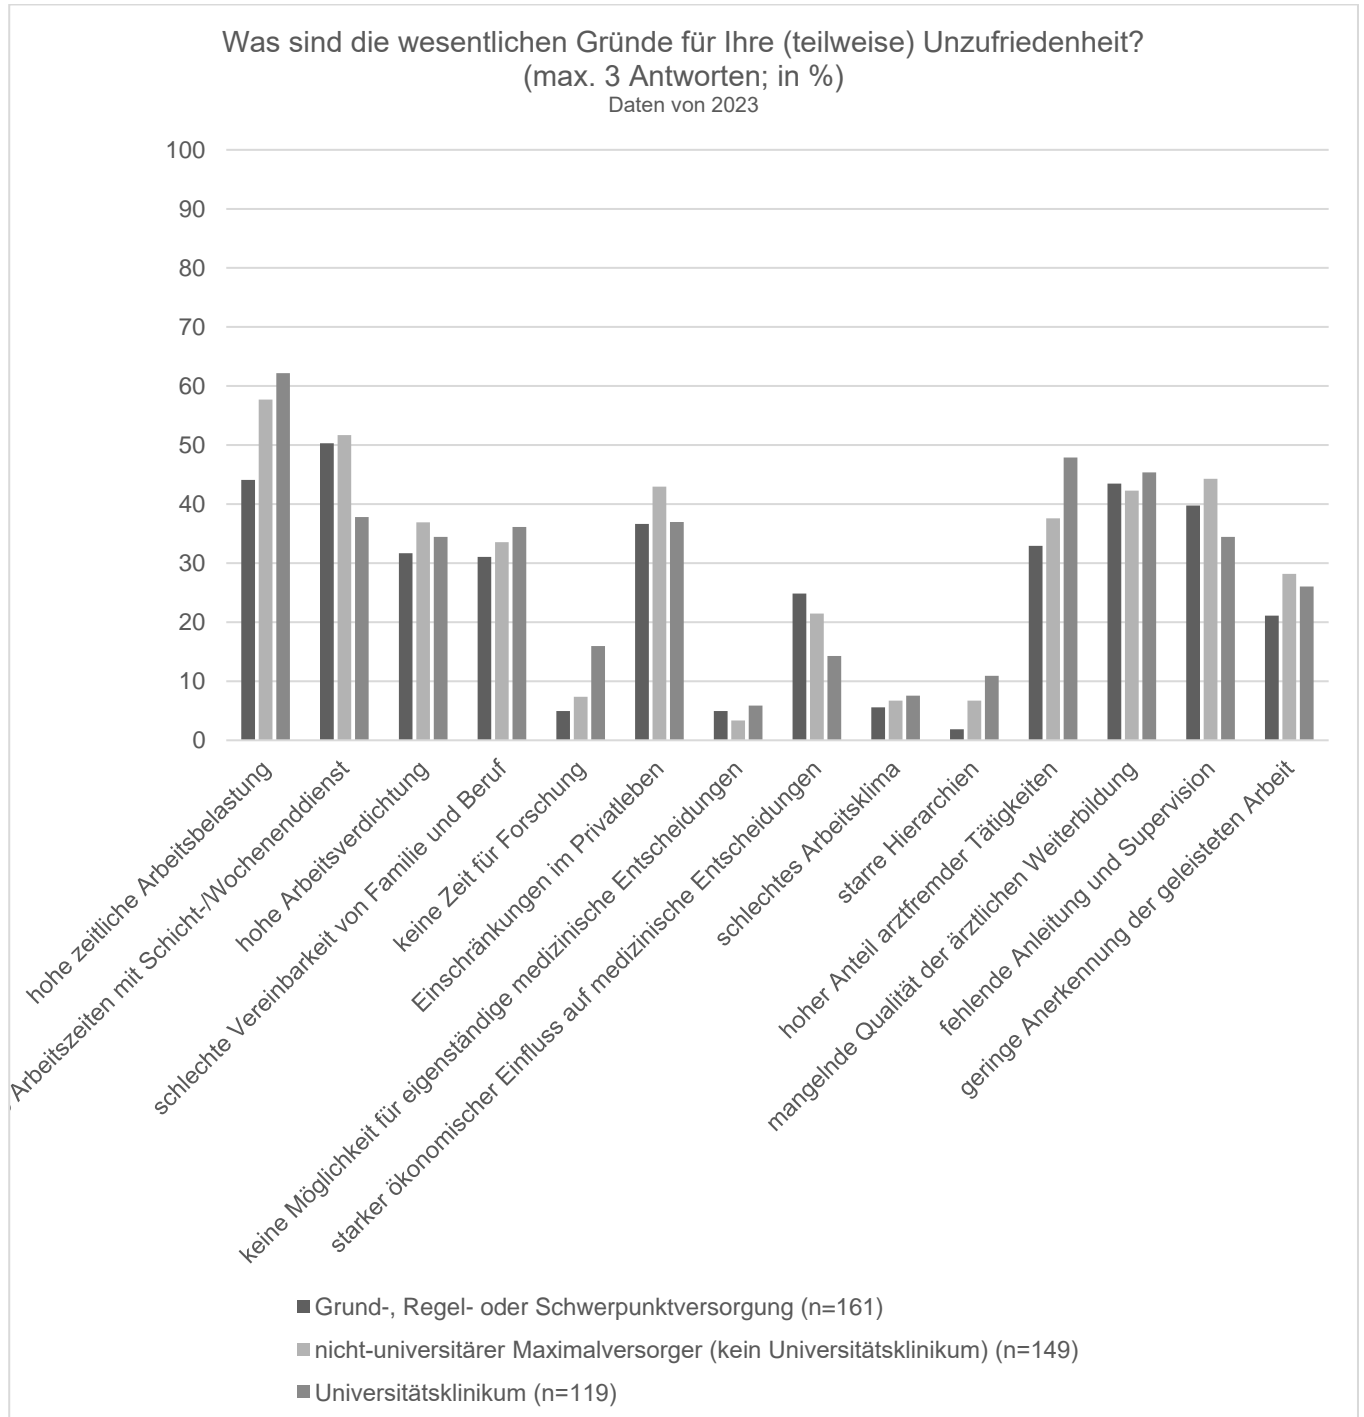

Abbildung 1b: Gründe für die Unzufriedenheit mit der aktuellen beruflichen Situation nach Weiterbildungsjahr

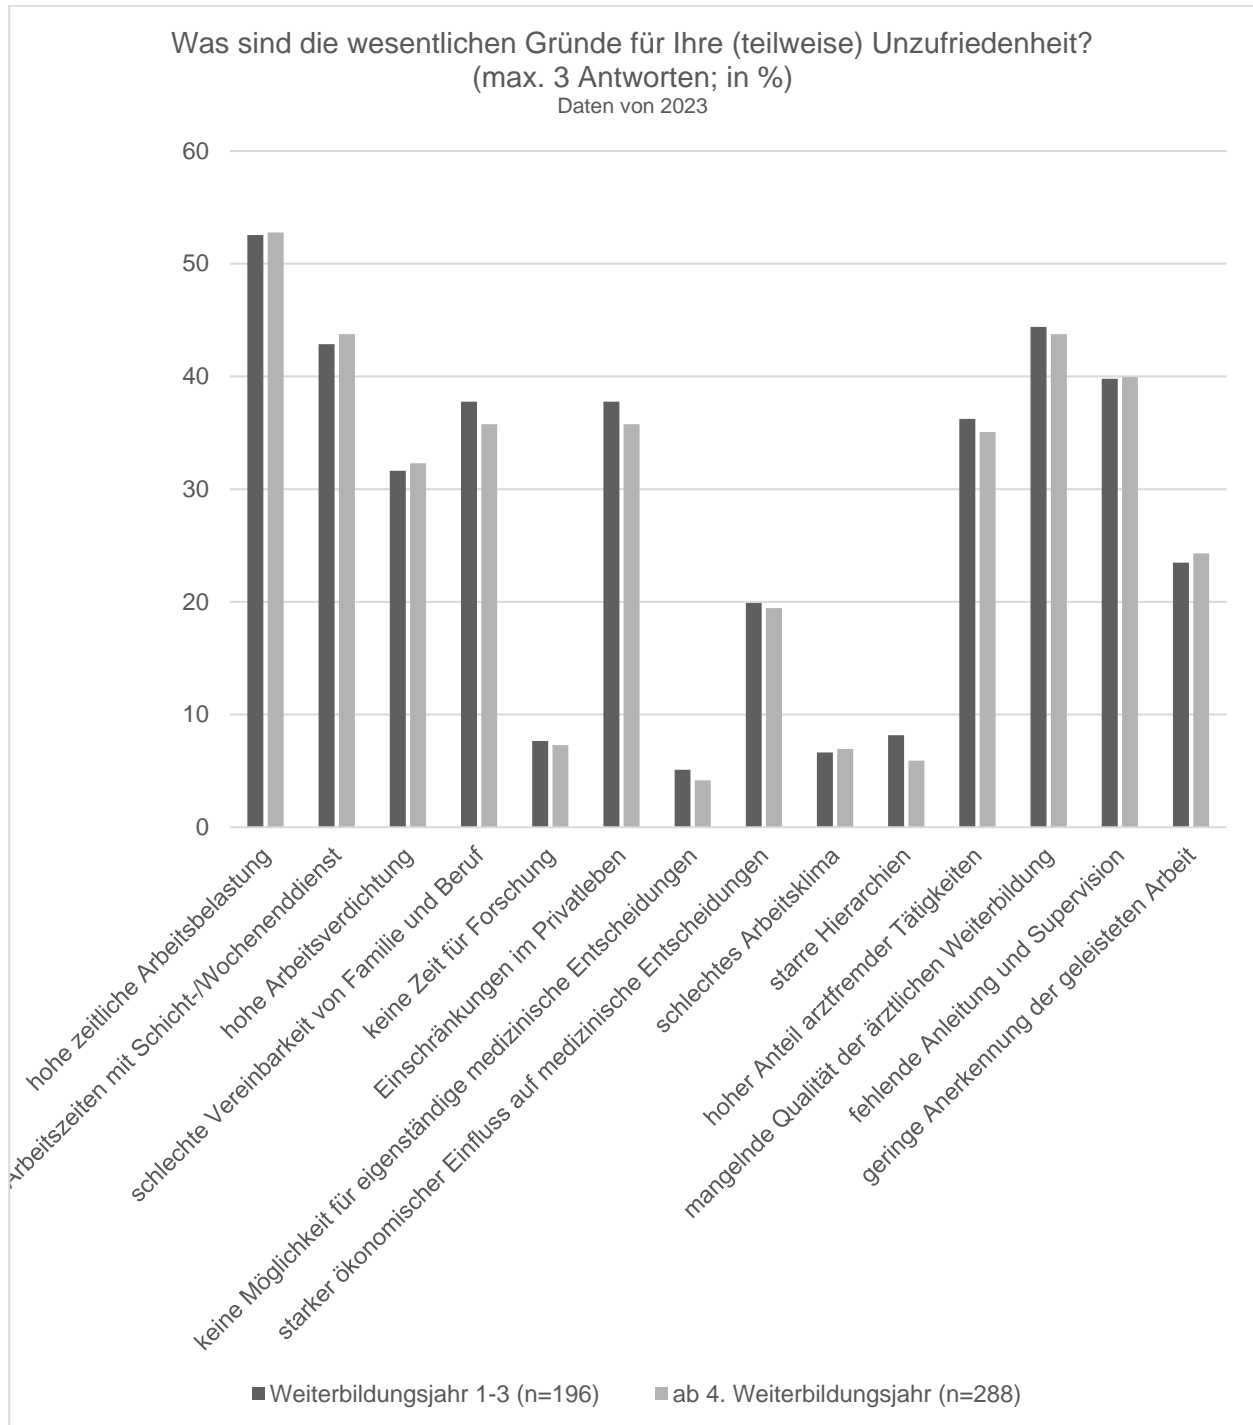

Abbildung 2a: Arbeitszufriedenheit nach Versorgungsstufe des Krankenhauses

**Wie zufrieden sind Sie mit Ihrer aktuellen beruflichen Situation?**

(1 = sehr unzufrieden; 5 = sehr zufrieden)  
Daten von 2023

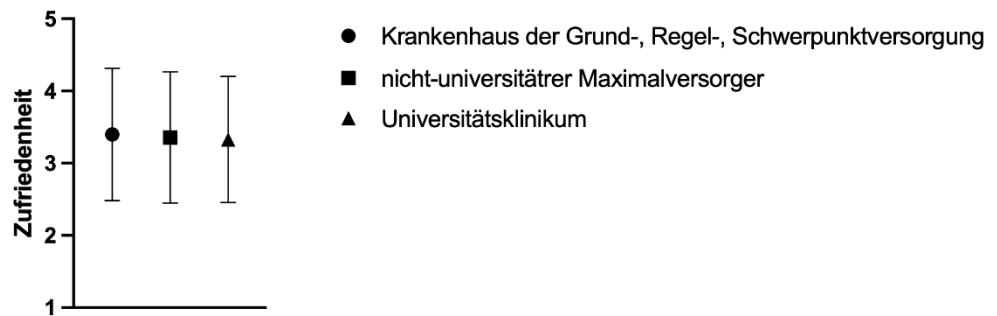

Abbildung 2b: Arbeitszufriedenheit nach Weiterbildungsjahr

**Wie zufrieden sind Sie mit Ihrer aktuellen beruflichen Situation?**

(1 = sehr unzufrieden; 5 = sehr zufrieden)  
Daten von 2023

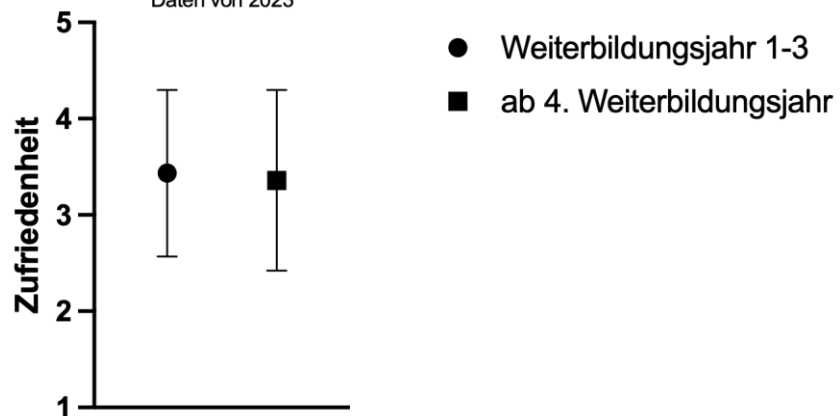

Abbildung 3a: Zufriedenheit mit der Weiterbildung nach Versorgungsstufe des Krankenhauses

**Wie zufrieden sind Sie insgesamt mit Ihrer Weiterbildung in der Kinder- und Jugendmedizin?**

(1 = sehr unzufrieden; 5 = sehr zufrieden)  
Daten von 2023

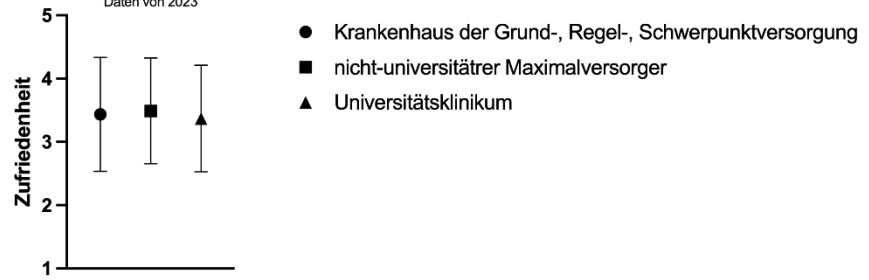

Abbildung 3b: Zufriedenheit mit der Weiterbildung nach Weiterbildungsjahr

**Wie zufrieden sind Sie insgesamt mit Ihrer Weiterbildung in der Kinder- und Jugendmedizin?**

(1 = sehr unzufrieden; 5 = sehr zufrieden)  
Daten von 2023

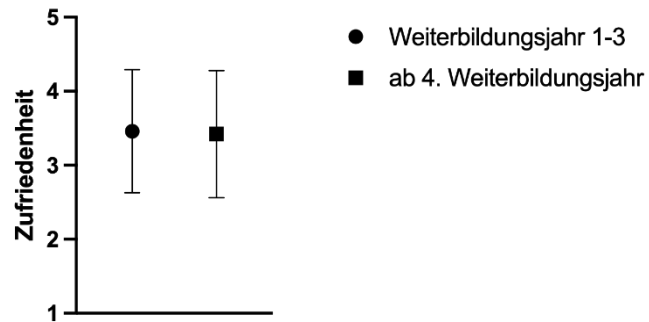

Abbildung 4a: Zufriedenheit mit den Bedingungen für Forschung

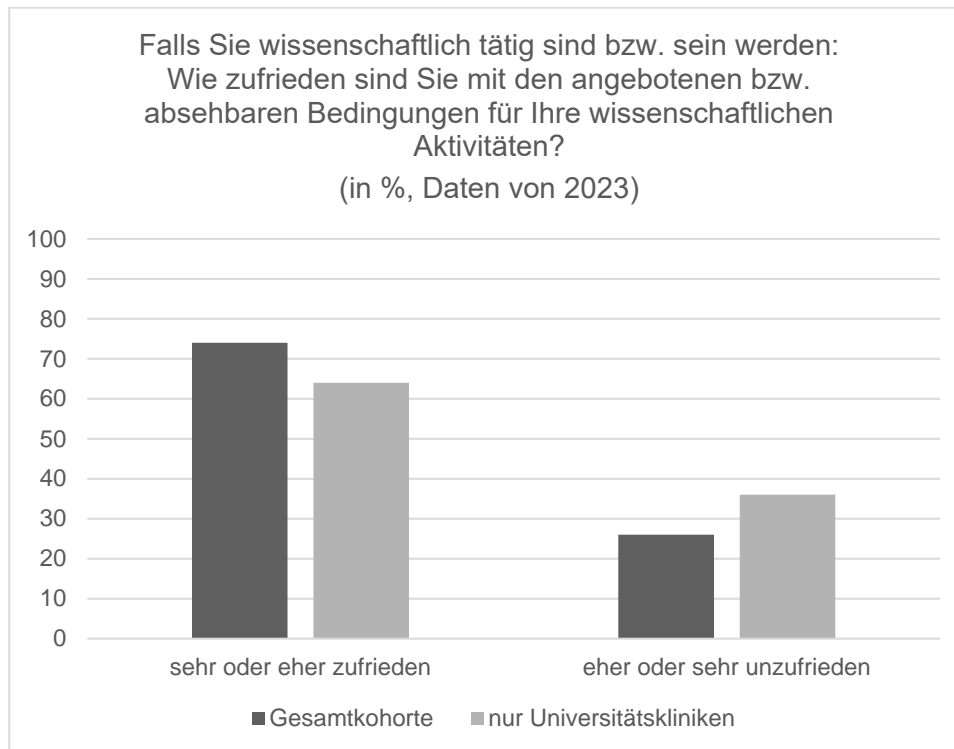

Abbildung 4b: Gründe für die Unzufriedenheit mit den Bedingungen für die Forschung

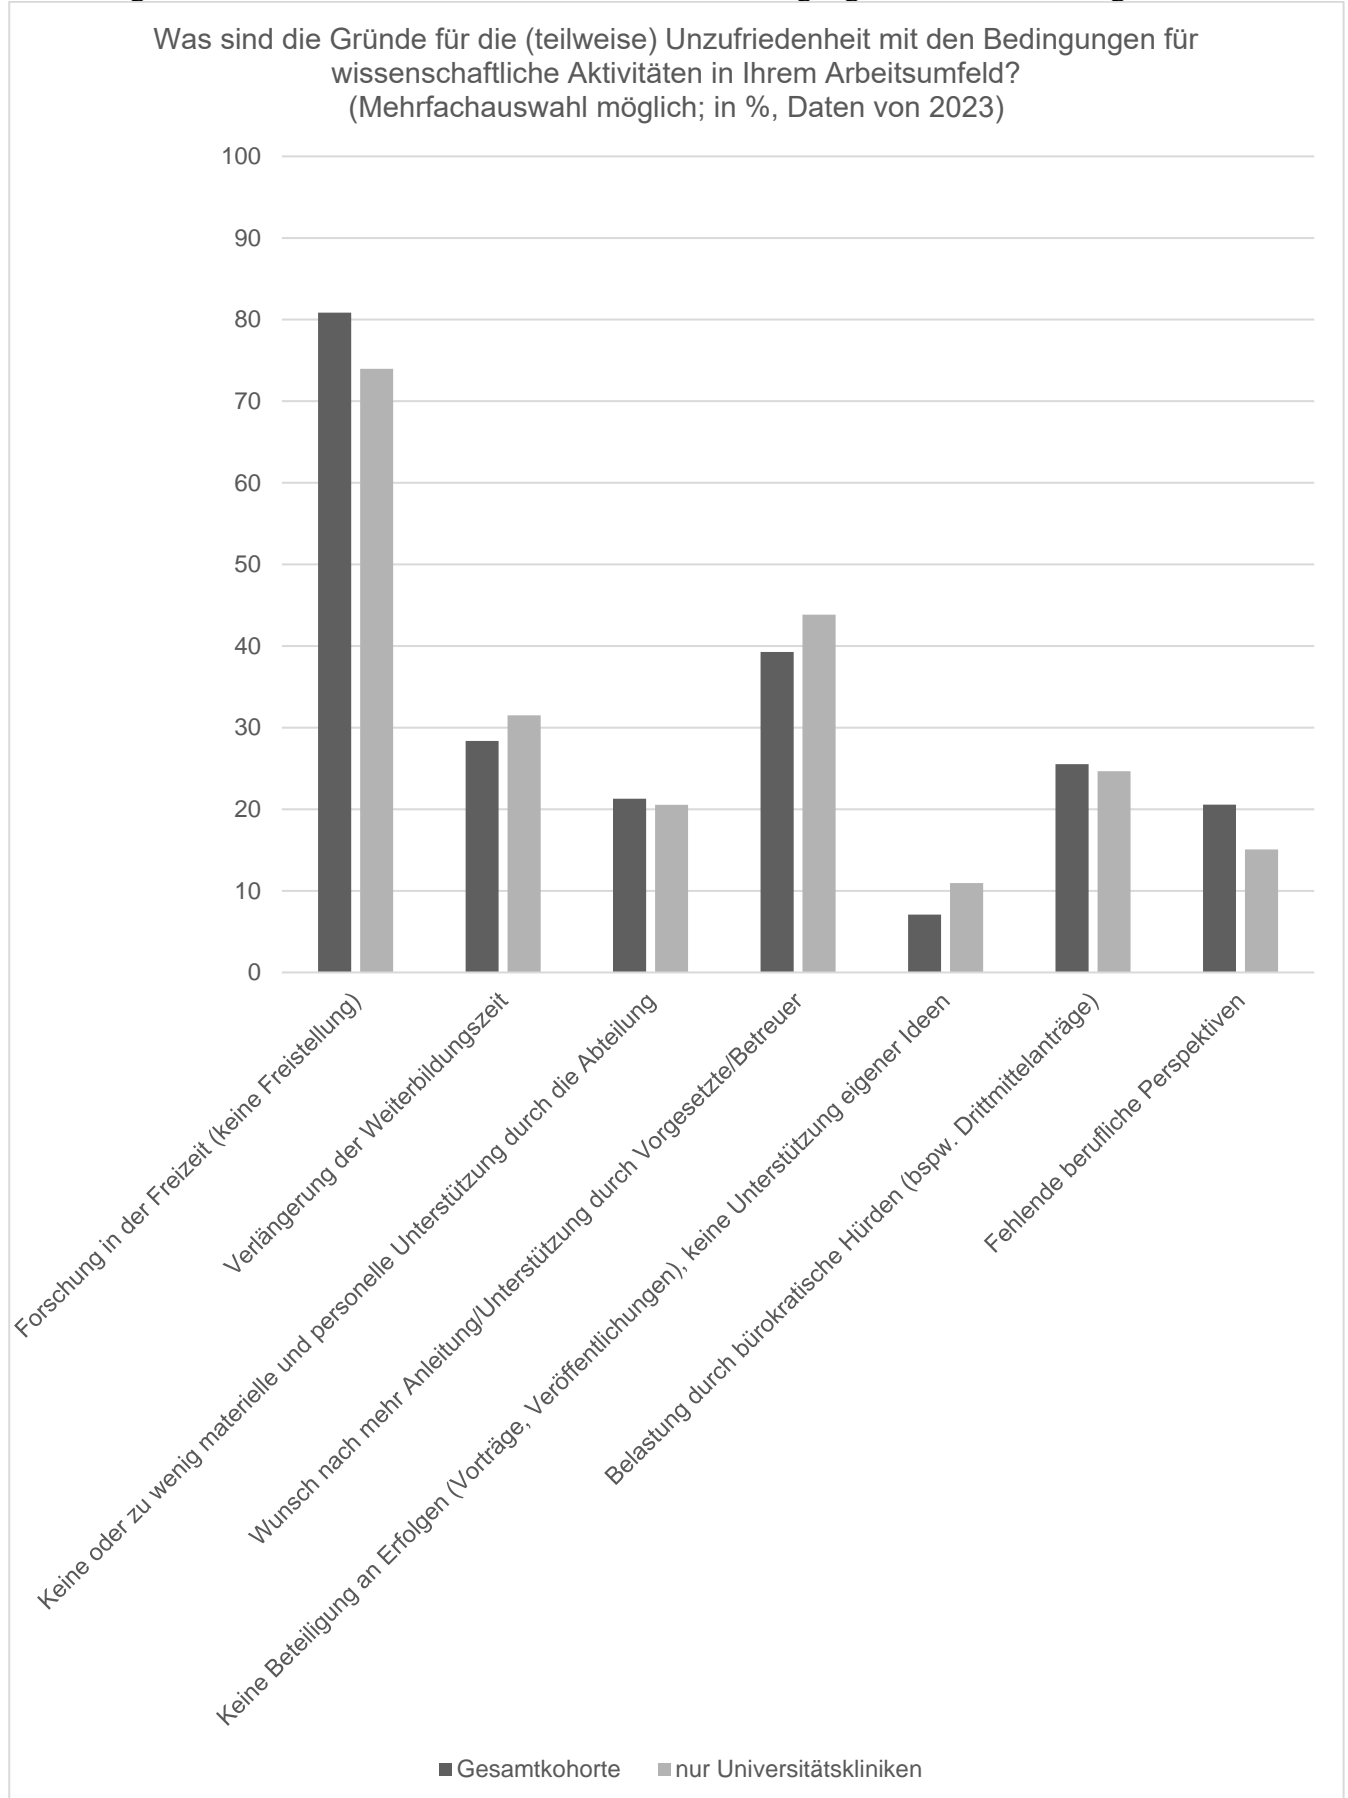

Supplement: MOESM1 [file 26871444]
