# Supplementary material for: Ergebnisse einer deutschlandweiten Weiterbildungsbefragung in der Kinder- und Jugendmedizin – „Das System sieht gar nicht vor, dass Zeit geopfert wird für Weiterbildung“
Source: Springer Nature journal article supplement (doi:10.1007/s00112-024-01947-3), 2024-03-18
Supplement: MOESM2 [file 26871444]

## Appendix 2 – Vollständiger Fragebogen

F1 Wie zufrieden sind Sie insgesamt mit Ihrer augenblicklichen beruflichen Situation?

- sehr zufrieden
- eher zufrieden
- unentschieden – teils, teils
- eher unzufrieden
- sehr unzufrieden

F2 Was sind die wesentlichen Gründe für Ihre (teilweise) Unzufriedenheit? Bitte wählen Sie bis zu drei der für Sie zutreffendsten Antworten!

- hohe zeitliche Arbeitsbelastung
- unregelmäßige Arbeitszeiten mit Schicht-/Wochenenddienst
- hohe Arbeitsverdichtung
- schlechte Vereinbarkeit von Familie und Beruf
- keine Zeit für Forschung
- Einschränkungen im Privatleben
- keine Möglichkeit für eigenständige medizinische Entscheidungen
- starker ökonomischer Einfluss auf medizinische Entscheidungen
- schlechtes Arbeitsklima
- starre Hierarchien
- hoher Anteil arztfremder Tätigkeiten
- mangelnde Qualität der ärztlichen Weiterbildung
- fehlende Anleitung und Supervision
- geringe Anerkennung der geleisteten Arbeit
- Sonstiges (bitte angeben)

F3 Bitte schätzen Sie den Anteil folgender Tätigkeiten an Ihrem beruflichen Arbeitsalltag ein. Die Gesamtsumme soll 100% ergeben.

- Anteil der Arbeit mit und am Patienten (z. B. Patientenaufnahme, Visite, Patienten-/Angehörigengespräche, technische Untersuchungen am Patienten wie Sonographie etc.)
- Anteil Patienten bezogener Arbeiten (z. B. Tumorkonferenz, Fallbesprechung mit der/dem Oberärztin/-arzt, Dokumentation von Verläufen, Arztbriefe)
- Anteil nicht ärztlicher bzw. patientenferner Tätigkeiten (z.B. Befunde oder Termine organisieren, Untersuchungen anmelden, Diagnosen oder Eingriffe kodieren)

F4 Wie hat sich die Qualität der Patientenversorgung Ihrer Meinung nach über die letzten Jahre verändert? Angaben bitte zwischen +5/sehr positiv, über 0/gar nicht bis -5/sehr negativ

F5 Welche Gründe halten Sie hierfür für besonders gewichtig? Die Auswahl mehrerer Antworten ist möglich.

- Durch die Zunahme nicht ärztlicher Tätigkeiten bleibt zu wenig Zeit für die unmittelbare Patientenversorgung.
- Durch die Arbeitsverdichtung z. B. bedingt durch Personalmangel bleibt zu wenig Zeit für eine qualitativ hochwertige Versorgung der Patienten.
- Die mangelnde ärztliche Fort- und Weiterbildung gefährdet die qualitativ hochwertige Versorgung der Patienten.
- Die unzureichende Supervision durch erfahrene Kollegen und Oberärzte gefährdet die qualitativ hochwertige Versorgung der Patienten.
- Die ungenügende technische Ausstattung in meiner Klinik/Abteilung gefährdet die qualitativ hochwertige Versorgung der Patienten.
- Sonstiges (bitte angeben)

F6 Haben Sie bereits aus Unzufriedenheit über Ihre Arbeitsbedingungen eine oder mehrere der nachfolgend genannten Konsequenzen gezogen bzw. daran gedacht?

- die Arbeitszeit reduziert
- den Arbeitsplatz (Abteilung oder Krankenhaus) gewechselt
- die praktisch ärztliche Tätigkeit aufgegeben
- ins Ausland gegangen

F7 Wie zufrieden sind Sie insgesamt mit Ihrer Weiterbildung in der Kinder- und Jugendmedizin?

- sehr zufrieden
- eher zufrieden
- unentschieden – teils, teils
- eher unzufrieden
- sehr unzufrieden

F8 Arbeiten Sie derzeit in Voll- oder Teilzeit?

- Vollzeit
- Teilzeit

F9 Fühlen Sie sich durch die Arbeit in Teilzeit im Hinblick auf das Fortkommen in Ihrer Weiterbildung benachteiligt?

- Nein, ich fühle mich dadurch nicht benachteiligt.
- Ja, ich fühle mich dadurch benachteiligt aus folgendem Grund/folgenden Gründen:

F10 Haben Sie mit Antritt der ersten Anstellung einen Arbeitsvertrag über die gesamte Weiterbildungszeit erhalten?

- Ja
- Nein

F11 Gibt es bei Ihnen ein strukturiertes Weiterbildungscurriculum mit von Beginn an fest geplanten Lerninhalten/Rotationen?

- Ja
- Nein
- Sonstiges (bitte angeben)

F12 Werden die Vorgaben dieses Weiterbildungscurriculums umgesetzt?

- Ja
- Teilweise
- Nein

F13 Wie zufrieden sind Sie mit der Qualität dieses Weiterbildungscurriculums?

- sehr zufrieden
- eher zufrieden
- unentschieden – teils, teils
- eher unzufrieden
- sehr unzufrieden

F14 Denken Sie, dass Sie zum Ende der (Regel-) Weiterbildungszeit die vorgeschriebenen Weiterbildungsinhalte absolviert haben werden?

- Ja
- Nein

F15 Werden Ihrer Einschätzung nach die geforderten Weiterbildungsinhalte während Ihrer alltäglichen klinischen Arbeit ausreichend vermittelt?

- Ja, absolut
- Ja, meistens
- Nein, eher nicht
- Nein, gar nicht

F16 Wie viele Stunden Ihrer regulären Arbeitszeit pro Woche sind fest eingeplante und als solche deklarierte Weiterbildungsangebote?

- 5 oder mehr Stunden
- 3-4 Stunden
- 1-2 Stunden
- 0 Stunden

F17 Wie viele Stunden davon können Sie im Arbeitsalltag wahrnehmen? (bei vorheriger Antwort „5 oder mehr Stunden“)

- 5 oder mehr Stunden
- 3-4 Stunden
- 1-2 Stunden
- 0 Stunden

F18 Wie viele Stunden davon können Sie im Arbeitsalltag wahrnehmen? (bei vorheriger Antwort „3-4 Stunden“)

- 3-4 Stunden
- 1-2 Stunden
- 0 Stunden

F19 Wie viele Stunden davon können Sie im Arbeitsalltag wahrnehmen? (bei vorheriger Antwort „1-2 Stunden“)

- 1-2 Stunden
- 0 Stunden

F20 In welcher Form findet an Ihrer Klinik das jährlich geforderte Weiterbildungsgespräch statt?

- Als überwiegend strukturiertes und konstruktives Gespräch, das mir hilft.
- Als beiläufiges Gespräch, das eher dem Zweck der Dokumentation im Logbuch dient.
- Gar nicht.
- Sonstiges (bitte angeben)

F21 Denken Sie, dass die Inanspruchnahme externer Fortbildungen notwendig ist, um die Kompetenzen laut Weiterbildungsordnung bis zum Ende der Weiterbildungszeit zu erlernen?

- Nein, ich denke nicht, dass dafür externe Weiterbildungen/Fortbildungen in Anspruch genommen werden müssen.
- Ja, ich glaube die Inanspruchnahme externer Angebote ist hilfreich.
- Ja, ich glaube die Inanspruchnahme externer Angebote ist unerlässlich.

F22 Finden in Ihrer Abteilung regelmäßig interne Weiter- und Fortbildungsveranstaltungen statt?

- Ja, wöchentlich
- Ja, monatlich
- Ja, quartalsweise
- Nein, gar nicht

F23 Sind die Inhalte der internen Fortbildung hilfreich für Ihre Weiterbildung?

- Ja, sehr
- Ja, teilweise
- Nein, eher nicht
- Nein, gar nicht

F24 Von wem werden Sie in Ihrer praktischen Tätigkeit überwiegend angeleitet?

- (erfahrene) Assistenzärzte/-ärztinnen
- Fachärzte/-ärztinnen
- Oberärzte/-ärztinnen
- Chefarzte/-ärztinnen
- Andere (bitte angeben)

F25 Welche Rahmenbedingungen/Weiterbildungsinstrumente sind für Sie persönlich besonders effektiv/gewinnbringend? Bitte wählen Sie bis zu vier der für Sie zutreffendsten Antworten!

- Supervision durch Facharzt/-ärztin / Oberarzt/-ärztin
- Regelmäßiges Feedback durch die/den Weiterbildungsbefugte/n
- Mentor/in mit Vorbildfunktion
- Strukturiertes Curriculum mit festem, transparentem Rotationsplan
- Regelmäßige klinikinterne Fortbildungen
- Kongressbesuche, externe Fortbildungen
- Formative Zwischenprüfungen
- Ausgebildete Weiterbildende mit formaler Lehrqualifikation
- SOPs
- Andere (bitte angeben)

F26 Welche Rahmenbedingungen/Weiterbildungsinstrumente bietet Ihre Klinik? Bitte kreuzen Sie alle vorhandenen an.

- Supervision durch Facharzt/-ärztin / Oberarzt/-ärztin
- Regelmäßiges Feedback durch die/den Weiterbildungsbefugte/n
- Mentor/in mit Vorbildfunktion
- Strukturiertes Curriculum mit festem, transparentem Rotationsplan
- Regelmäßige klinikinterne Fortbildungen
- Kongressbesuche, externe Fortbildungen
- Formative Zwischenprüfungen
- Ausgebildete Weiterbildende mit formaler Lehrqualifikation
- SOPs
  
- Anderes (bitte angeben)

F27 Welche Rahmenbedingung/welches Weiterbildungsinstrument sollte an Ihrer Klinik am dringendsten ausgebaut werden? Bitte wählen Sie das für Sie wichtigste aus.

- Supervision durch Facharzt/-ärztin / Oberarzt/-ärztin
- Regelmäßiges Feedback durch die/den Weiterbildungsbefugte/n
- Mentor/in mit Vorbildfunktion
- Strukturiertes Curriculum mit festem, transparentem Rotationsplan
- Regelmäßige klinikinterne Fortbildungen
- Kongressbesuche, externe Fortbildungen
- Formative Zwischenprüfungen
- Ausgebildete Weiterbildende mit formaler Lehrqualifikation
  
- SOPs
- Andere (bitte angeben)

F28 Gibt es in Ihrer Klinik ein strukturiertes Einarbeitungskonzept für verschiedene Tätigkeitsbereiche?

- Ja
- Teilweise
- Nein

F29 Wird dieses Einarbeitungskonzept eingehalten?

- Ja, immer
- Ja, meistens
- Nein, eher nicht
- Nein, gar nicht

F30 Wie hoch schätzen Sie das Interesse Ihres Trägers ein, sich aktiv für eine gute Facharztausbildung einzusetzen?

- Sehr hoch
- Eher hoch
- Eher gering
- Sehr gering

F31 Fühlen Sie sich in Anbetracht Ihres Ausbildungsstandes mit den Aufgaben, mit denen Sie betraut werden, überfordert?

- Nie
- Selten
- Regelmäßig
- Häufig

F32 Was sind aus Ihrer Sicht die häufigsten Gründe, warum Weiterbildungsinhalte nicht vermittelt werden können? Bitte wählen Sie bis zu drei für Sie zutreffende Antworten!

- Personalmangel
- Krankheitsausfälle
- Zu hohe Dienstbelastung
- Fehlendes Weiterbildungsangebot
- Fehlende Motivation der Weiterbilder
- Fehlende Eigeninitiative

- Fehlende Finanzierung durch den Träger
- Zu hohe Belastung durch Dokumentation
- Zu hohe Belastung durch fachfremde Tätigkeiten

F33 Tätigkeit in einer Praxis für Kinder- und Jugendmedizin

- Ich arbeite aktuell in einer Praxis für Kinder- und Jugendmedizin.
- Ich habe einen Teil meiner Weiterbildung in einer Praxis für Kinder- und Jugendmedizin absolviert.
- Ich habe vor einen Teil meiner Weiterbildung in einer Praxis für Kinder- und Jugendmedizin zu absolvieren.
- Ich habe nicht vor einen Teil meiner Weiterbildung in einer Praxis für Kinder- und Jugendmedizin zu absolvieren.

F34 Wie lange sind Sie in einer Praxis für Kinder- und Jugendmedizin tätig/tätig gewesen oder planen Sie tätig zu sein? (Angabe in Monaten)

- 1 Monat
- 2 Monate
- 3 Monate
- 4 Monate
- 5 Monate
- 6 Monate
- 7 Monate
- 8 Monate
- 9 Monate
- 10 Monate
- 11 Monate
- 12 Monate
- >12 Monate

F35 In welchem Jahr Ihrer Weiterbildung sind Sie in die Praxis gegangen/wollen Sie in die Praxis gehen?

- Jahr
- Jahr
- Jahr
- Jahr
- Jahr
- Jahr



F36 Wie sind Sie auf die Praxis, in der Sie tätig sind, aufmerksam geworden? Die Auswahl mehrerer Antworten ist möglich.

- Ich habe mich selbstständig informiert und hospitiert.
- Ich habe mit Kollegen/Kolleginnen gesprochen.
- Ich weiß nicht, wie ich mich über die Weiterbildung in Praxen und die Qualität der Weiterbildung informieren kann.
- Meine Klinik hat eine Kooperation/Weiterbündungsverbund mit Praxen in der Umgebung.
- Ich habe mich über folgende Medien informiert: (bitte angeben)

F37 Wie zufrieden waren Sie mit Zugangsbedingungen/bürokratischen Hürden/Absprachen mit KV?

- Sehr zufrieden
- Eher zufrieden
- Eher unzufrieden
- Sehr unzufrieden

F38 Wie zufrieden waren Sie mit Ihrem Gehalt?

- Sehr zufrieden
- Eher zufrieden
- Eher unzufrieden
- Sehr unzufrieden

F39 Wurde das Gehalt an den Tarifvertrag der Klinik angepasst?

- Ja
- Nein

F40 Wie zufrieden waren Sie mit Ihren Arbeitszeiten?

- sehr zufrieden
- eher zufrieden
- unentschieden – teils, teils
- eher unzufrieden
- sehr unzufrieden

F41 Wie zufrieden waren Sie mit der Weiterbildung?

- sehr zufrieden
- eher zufrieden
- unentschieden – teils, teils
- eher unzufrieden
- sehr unzufrieden

F42 Gab es ein internes Weiterbildungskonzept?

- Ja
- Nein

F43 Wurde für Ihre Weiterbildung PaedCompenda genutzt?

- Ja
- Nein

F44 Wie zufrieden waren Sie damit?

- sehr zufrieden
- eher zufrieden
- unentschieden – teils, teils
- eher unzufrieden
- sehr unzufrieden

F45 Fanden Sie den Preis für PaedCompenda angemessen?

- Ja
- Nein

F46 Hätten Sie gerne PaedCompenda in der Klinik gehabt?

- Ja
- Nein

F47 Gab es eine Einarbeitungszeit?

- Ja
- Nein

F48 Wie lange war Ihre Einarbeitungszeit? (in Wochen)

- < 1 Woche
- 1 Woche
- 2 Wochen
- 3 Wochen
- 4 Wochen
- 5 Wochen
- > 5 Wochen

F49 Haben Sie während Ihrer Weiterbildungszeit KV-Dienste abgeleistet?

- Ja
- Nein

F50 Welches Arbeitsmodell galt während der Zeit in der Praxis/der Kooperation/im Weiterbildungsverbund?

- Ich arbeite Teilzeit in Praxis und Klinik.
- Ich arbeite eine Zeit lang Vollzeit in der Praxis und kann dann wieder auf meine alte Stelle wechseln.
- Ich habe einen gesonderten Arbeitsvertrag für die Praxis.
- Ich habe einen Abordnungsvertrag.
- Ich musste kündigen um in die Praxis gehen zu können.

F51 Können Sie sich vorstellen nach der Facharztprüfung in der Niederlassung zu arbeiten?

- Ja
- Nein

F52 Welche Bedingungen wären für eine Niederlassung notwendig?  
[Freitext]

F53 Wäre es hilfreich, wenn Bürokratie gegen Bezahlung ausgelagert wäre?

- Ja
- Nein

F54 Unter welchen Bedingungen käme die Arbeit in der Niederlassung für Sie in Betracht? Die Auswahl mehrerer Antworten ist möglich.

- Vollzeit
- Teilzeit
- Angestellt
- Teilhaber
- MVZ
- Einzelpraxis
- Neue Konstrukte (Genossenschaften etc.)
- Teilzeit Klinik und Praxis
- Egal wie, Hauptsache mein eigener Chef

F55 Bitte wählen Sie eine Option aus.

- Ich habe ein oder mehrere Kind/Kinder.
- Ich habe kein/e Kind/Kinder, möchte die Fragen zu Beruf und Familie dennoch beantworten.
- Ich habe kein/e Kind/Kinder und möchte die Fragen zu Familie und Beruf überspringen.

F56 Ich bin mit der Vereinbarkeit von Familie und Beruf an meinem Arbeitsplatz zufrieden.

- Trifft voll zu
- Trifft eher zu
- Teils, teils
- Trifft eher nicht zu
- Trifft nicht zu

F57 Es gibt regelmäßig Situationen, in denen ich familiäre Aufgaben zu Gunsten der Arbeit vernachlässigen muss oder umgekehrt.

- Trifft voll zu
- Trifft eher zu
- Teils, teils
- Trifft eher nicht zu
- Trifft nicht zu

F58 Ich fühle mich bei der Vereinbarkeit von Beruf und Familie von meinem Arbeitgeber unterstützt (z. B. durch flexiblere Gestaltung der Arbeitszeiten).

- Trifft voll zu
- Trifft eher zu
- Teils, teils
- Trifft eher nicht zu
- Trifft nicht zu

F59 Ich fühle mich bei der Vereinbarkeit von Beruf und Familie von meinen Kollegen/Kolleginnen unterstützt (z. B. durch flexible Gestaltung der Arbeitszeiten).

- Trifft voll zu
- Trifft eher zu
- Teils, teils
- Trifft eher nicht zu
- Trifft nicht zu

F60 Welche der folgenden Faktoren würden Ihnen eine gute Balance zwischen Arbeit und einem Privatleben mit familiären Aufgaben erleichtern/ermöglichen? Wählen Sie bis zu drei für Sie wichtige Faktoren.

- flexiblere Gestaltung der Arbeitszeiten z. B. durch mehr Mitsprache bei der Festlegung der Arbeitszeit
- besser planbare oder regelmäßige Arbeitszeiten
- weniger Überstunden
- Kinderbetreuungsplatz
- Ganztagsbetreuung
- Kinderbetreuungsplatz in der Nähe der Arbeitsstelle

- mehr Rücksicht von Kolleginnen und Kollegen
- teilweise Arbeit von zu Hause aus (Dokumentation, Arztbriefe über das Intranet)
- optionaler Betreuungsdienst für Kinder bzw. Angehörige in Notfällen, bei Sitzungen oder während der Schulferien
- finanzielle Unterstützung
- Mentorenprogramm
- Sonstiges (bitte angeben)

F61 Familienfreundlichkeit wird an meinem Arbeitsplatz bspw. in Fortbildungsangeboten, Newslettern sowie Unterstützungsangeboten thematisiert und gehört somit zur Unternehmenskultur.

- Trifft voll zu
- Trifft eher zu
- Teils, teils
- Trifft eher nicht zu
- Trifft nicht zu

F62 Ich habe mich bisher gegen mehr familiäre Verantwortung entschieden, weil dies mit meinem beruflichen Werdegang nicht vereinbar war.

- Trifft voll zu
- Trifft eher zu
- Teils, teils
- Trifft eher nicht zu
- Trifft nicht zu

F63 Rücksicht auf Mitarbeiter/-innen mit familiären Verpflichtungen geht häufig zu Lasten von Mitarbeitern/Mitarbeiterinnen ohne familiäre Verpflichtungen.

- Trifft voll zu
- Trifft eher zu
- Teils, teils
- Trifft eher nicht zu
- Trifft nicht zu

F64 Haben Sie Elternzeit genommen?

- Ich habe bisher keine Elternzeit genommen.
- Ich plane Elternzeit zu nehmen.
- Ich habe bereits Elternzeit genommen.
- Ich habe bereits Elternzeit genommen und plane eine weitere Elternzeit.
- Sonstiges (bitte angeben)

F65 Ich plane Elternzeit in folgender Länge: (Angabe in vollen Monaten)

- 1 Monat
- 2 Monate
- 3 Monate
- 4 Monate
- 5 Monate
- 6 Monate
- 7 Monate

- 8 Monate
- 9 Monate
- 10 Monate
- 11 Monate
- 12 Monate
- 13 Monate
- 14 Monate
- 15 Monate
- 16 Monate
- 17 Monate
- 18 Monate
- 19 Monate
- 20 Monate
- 21 Monate
- 22 Monate
- 23 Monate
- 24 Monate
- 25 Monate
- 26 Monate
- 27 Monate
- 28 Monate
- 29 Monate
- 30 Monate
- 31 Monate
- 32 Monate
- 33 Monate
- 34 Monate
- 35 Monate
- 36 Monate

F66 Ich habe Elternzeit genommen: (Angabe in vollen Monaten)

- 1 Monat
- 2 Monate
- 3 Monate
- 4 Monate
- 5 Monate
- 6 Monate
- 7 Monate
- 8 Monate
- 9 Monate
- 10 Monate
- 11 Monate
- 12 Monate
- 13 Monate
- 14 Monate
- 15 Monate
- 16 Monate
- 17 Monate
- 18 Monate

- 19 Monate
- 20 Monate
- 21 Monate
- 22 Monate
- 23 Monate
- 24 Monate
- 25 Monate
- 26 Monate
- 27 Monate
- 28 Monate
- 29 Monate
- 30 Monate
- 31 Monate
- 32 Monate
- 33 Monate
- 34 Monate
- 35 Monate
- 36 Monate

F67 Hat Ihr/e Partner/in Elternzeit genommen?

- Sie/Er hat bisher keine Elternzeit genommen.
- Sie/Er plant Elternzeit zu nehmen.
- Sie/Er hat bereits Elternzeit genommen.

F68 Sie/Er plant Elternzeit in folgender Länge: (Angabe in vollen Monaten)

- 1 Monat
- 2 Monate
- 3 Monate
- 4 Monate
- 5 Monate
- 6 Monate
- 7 Monate
- 8 Monate
- 9 Monate
- 10 Monate
- 11 Monate
- 12 Monate
- 13 Monate
- 14 Monate
- 15 Monate
- 16 Monate
- 17 Monate
- 18 Monate
- 19 Monate
- 20 Monate
- 21 Monate
- 22 Monate

- 23 Monate
- 24 Monate
- 25 Monate
- 26 Monate
- 27 Monate
- 28 Monate
- 29 Monate
- 30 Monate
- 31 Monate
- 32 Monate
- 33 Monate
- 34 Monate
- 35 Monate
- 36 Monate

F69 Sie/Er hat Elternzeit genommen: (Angabe in vollen Monaten)

- 1 Monat
- 2 Monate
- 3 Monate
- 4 Monate
- 5 Monate
- 6 Monate
- 7 Monate
- 8 Monate
- 9 Monate
- 10 Monate
- 11 Monate
- 12 Monate
- 13 Monate
- 14 Monate
- 15 Monate
- 16 Monate
- 17 Monate
- 18 Monate
- 19 Monate
- 20 Monate
- 21 Monate
- 22 Monate
- 23 Monate
- 24 Monate
- 25 Monate
- 26 Monate
- 27 Monate
- 28 Monate
- 29 Monate
- 30 Monate
- 31 Monate
- 32 Monate



- 33 Monate
- 34 Monate
- 35 Monate
- 36 Monate

F70 Werden in Ihrer Klinik/Abteilung Stellen mit reduzierter Wochenarbeitszeit angeboten und wäre es für Sie möglich in einer solchen Anstellung zu arbeiten bzw. tun Sie dies bereits?

- Ja, es werden Arbeitsverträge mit reduzierter Wochenarbeitszeit angeboten und ich könnte bzw. kann problemlos in einer solchen Anstellung arbeiten.
- Ja, es werden Arbeitsverträge mit reduzierter Wochenarbeitszeit angeboten, aber es ist dennoch schwierig in einer solchen Anstellung zu arbeiten (z. B. da nur wenige Stellen mit einer reduzierten Wochenarbeitszeit angeboten werden oder diese Arbeitsverträge nur einem bestimmten Personenkreis zur Verfügung stehen).
- Nein, in meiner Klinik/Abteilung werden keine Arbeitsverträge mit reduzierter Wochenarbeitszeit angeboten.

F71 Ist/Wäre es für Sie in allen Bereichen Ihrer Abteilung möglich mit reduzierter Wochenarbeitszeit zu arbeiten oder gibt es Bereiche (z. B. Intensivmedizin), in denen das nicht möglich ist?

- Ja, in unserer Abteilung besteht in allen Bereichen die Möglichkeit in Teilzeit zu arbeiten.
- Nein, nicht in allen Bereichen besteht die Möglichkeit zur Teilzeitbeschäftigung.
- Weiß ich nicht.

F72 Bietet Ihr Arbeitgeber eine betriebliche Kinderbetreuung (für Kinder bis zum Schulalter) an?

- Ja, es wird eine betriebliche Kinderbetreuung angeboten und ich nutze sie für mein Kind/meine Kinder bzw. könnte dies tun, wenn ich wollte.
- Ja, es wird eine betriebliche Kinderbetreuung angeboten, allerdings kann/könnte ich dieses Angebot für mein Kind/meine Kinder nicht nutzen (z. B. da zu geringe Kapazität, Betreuungszeiten nicht ausreichend/passend, etc.).
- Nein, es wird keine betriebliche Kinderbetreuung angeboten.

F73 War die Möglichkeit einer betrieblichen Kinderbetreuung ausschlaggebend für die Wahl des derzeitigen Arbeitsplatzes?

- Ja
- Nein

F74 War ein Platz in der betrieblichen Kinderbetreuung Teil der Vertragsverhandlungen?

- Ja
- Nein

F75 Stand zum Zeitpunkt der Einstellung sicher ein Kinderbetreuungsplatz zur Verfügung?

- Ja
- Nein

F76 Wurde ein Betreuungsplatz für Geschwisterkinder garantiert?

- Ja
- Nein

F77 Sind Sie promoviert?

- Nein, ich bin nicht promoviert und strebe dies auch nicht an.
- Nein, ich bin noch nicht promoviert, plane aber eine bzw. arbeite derzeit an einer Dissertation.
- Ja, ich bin promoviert.

F78 Sind Sie derzeit wissenschaftlich tätig oder wollen dies in Zukunft sein?

- Ja
- Nein

F79 Falls Sie wissenschaftlich tätig sind bzw. sein werden: Wie zufrieden sind Sie mit den angebotenen bzw. absehbaren Bedingungen für Ihre wissenschaftlichen Aktivitäten?

- sehr zufrieden
- eher zufrieden
- unentschieden – teils, teils
- eher unzufrieden
- sehr unzufrieden

F80 Was sind die Gründe für die (teilweise) Unzufriedenheit mit den Bedingungen für wissenschaftliche Aktivitäten in Ihrem Arbeitsumfeld? Die Auswahl mehrerer Antworten ist möglich.

- Ein Großteil meiner Forschung muss in der Freizeit erfolgen, da mir im Berufsalltag keine Zeit dafür eingeräumt wird (ich z. B. nicht dafür freigestellt werde).
- Meine Weiterbildungszeit verlängert sich deutlich durch mein Engagement in der Forschung.
- Meine Forschung wird durch meine Klinik/Abteilung materiell oder personell zu wenig unterstützt (z. B. keine Laborfläche, keine MTA, kein Geld für Verbrauchsmaterialien, keine Möglichkeit zu Hospitationen in anderen Einrichtungen o. ä.).
- Ich würde mir insgesamt mehr Anleitung/Unterstützung durch meine Vorgesetzten/Betreuer wünschen.
- Meinen Vorgesetzten/Betreuern fällt es schwer, mich an gemeinsamen Erfolgen (z. B. Vortragseinladungen, Veröffentlichungen, Antragsbewilligungen) zu beteiligen oder meine eigenen Ideen zu unterstützen.
- Die bürokratischen Hürden (z. B. aufwendige Antragsschreiben für Laborforschung) empfinde ich als große Belastung.
- Ich sehe keine beruflichen Perspektiven.
- Sonstiges (bitte angeben)

F81 Falls Sie nicht wissenschaftlich tätig sind bzw. sein wollen, was ist der wesentliche Grund dafür?

- Fehlendes wissenschaftliches Interesse
- Keine Möglichkeit in aktueller Klinik/Abteilung
- Insgesamt zu wenig Zeit, andere Dinge wichtiger
- Keine Zeit neben der klinischen Tätigkeit
- Wissenschaftliche Tätigkeit ohne Bedeutung für die weitere angestrebte berufliche Entwicklung
- Sonstige Gründe (bitte angeben)

F82 Welcher der folgenden Punkte würde die Forschung für Sie attraktiver machen? Bitte wählen Sie bis zu drei der für Sie zutreffendsten Antworten!

- Mehr zeitlicher Freiraum für Forschung während der klinischen Ausbildung
- Strukturierte Aus- und Weiterbildung in wissenschaftlichen Skills
- Unterstützung bei der Wahl des wissenschaftlichen Themas
- Höhere Wertschätzung der Forschung in den Kliniken
- Möglichkeit der Hospitation zur Methodenerweiterung
- Bessere Kinderbetreuung (z. B. gesicherte Betreuungsmöglichkeiten durch den Arbeitgeber)
- Bessere Aufstiegschancen und berufliche Perspektiven
- Mehr Gehalt
- Förderung von Auslandsaufenthalten
- Sonstiges (bitte angeben)

F83 Aufgrund des hohen Arbeitsaufkommens besteht häufig großer Zeitdruck.

- Stimme ich gar nicht zu.
- Stimme ich nicht zu.
- Stimme ich zu.
- Stimme ich voll zu.

F84 Bei meiner Arbeit werde ich häufig unterbrochen und gestört.

- Stimme ich gar nicht zu.
- Stimme ich nicht zu.
- Stimme ich zu.
- Stimme ich voll zu.

F85 Im Laufe meiner bisherigen Weiterbildungszeit ist meine Arbeit immer mehr geworden.

- Stimme ich gar nicht zu.
- Stimme ich nicht zu.
- Stimme ich zu.
- Stimme ich voll zu.

F86 Ich erhalte von meinem/r Vorgesetzten bzw. einer entsprechenden wichtigen Person die Anerkennung, die ich verdiene.

- Stimme ich gar nicht zu.
- Stimme ich nicht zu.
- Stimme ich zu.
- Stimme ich voll zu.

F87 Die Aufstiegschancen in meinem Bereich sind schlecht.

- Stimme ich gar nicht zu.
- Stimme ich nicht zu.
- Stimme ich zu.
- Stimme ich voll zu.

F88 Ich erfahre oder erwarte eine Verschlechterung meiner Arbeitssituation.

- Stimme ich gar nicht zu.
- Stimme ich nicht zu.
- Stimme ich zu.
- Stimme ich voll zu.

F89 Mein eigener Arbeitsplatz ist gefährdet.

- Stimme ich gar nicht zu.
- Stimme ich nicht zu.
- Stimme ich zu.
- Stimme ich voll zu.

F90 Wenn ich an all die erbrachten Leistungen und Anstrengungen denke, halte ich die erfahrene Anerkennung für angemessen.

- Stimme ich gar nicht zu.
- Stimme ich nicht zu.
- Stimme ich zu.
- Stimme ich voll zu.

F91 Wenn ich an all die erbrachten Leistungen und Anstrengungen denke, halte ich meine persönlichen Chancen des beruflichen Fortkommens für angemessen.

- Stimme ich gar nicht zu.
- Stimme ich nicht zu.
- Stimme ich zu.
- Stimme ich voll zu.

F92 Wenn ich an all die erbrachten Leistungen denke, halte ich mein Gehalt/meinen Lohn für angemessen.

- Stimme ich gar nicht zu.
- Stimme ich nicht zu.
- Stimme ich zu.
- Stimme ich voll zu.

F93 Beim Arbeiten komme ich leicht in Zeitdruck.

- Stimme ich gar nicht zu.
- Stimme ich nicht zu.
- Stimme ich zu.
- Stimme ich voll zu.

F94 Es passiert mir oft, dass ich schon beim Aufwachen an Arbeitsprobleme denke.

- Stimme ich gar nicht zu.
- Stimme ich nicht zu.
- Stimme ich zu.
- Stimme ich voll zu.

F95 Wenn ich nach Hause komme, fällt mir das Abschalten von der Arbeit sehr leicht.

- Stimme ich gar nicht zu.
- Stimme ich nicht zu.
- Stimme ich zu.
- Stimme ich voll zu.

F96 Diejenigen, die mir am nächsten stehen, sagen, ich opfere mich zu sehr für meinen Beruf auf.

- Stimme ich gar nicht zu.
- Stimme ich nicht zu.
- Stimme ich zu.
- Stimme ich voll zu.

F97 Die Arbeit lässt mich selten los, das geht mir abends noch durch den Kopf.

- Stimme ich gar nicht zu.
- Stimme ich nicht zu.
- Stimme ich zu.
- Stimme ich voll zu.

F98 Wenn ich etwas verschiebe, was ich eigentlich heute tun müsste, kann ich nachts nicht schlafen.

- Stimme ich gar nicht zu.
- Stimme ich nicht zu.
- Stimme ich zu.
- Stimme ich voll zu.

F99 Welchen Geschlechts sind Sie?

- Weiblich
- Männlich
- Divers

F100 Wie alt sind Sie?

- 20-25 Jahre
- 26-30 Jahre
- 31-35 Jahre
- 36-40 Jahre
- Über 40 Jahre

F101 Personenstand

- ledig/nicht in einer Partnerschaft lebend
- verheiratet/in einer Partnerschaft lebend

F102 Haben Sie Kinder?

- Ja
- Nein

F103 Wie viele Kinder haben Sie?

- 1
- 2
- 3
- Mehr als 3

F104 Wie alt ist Ihr jüngstes Kind?

- Jünger als 1 Jahr
- 1 Jahr
- 2 Jahre
- 3 Jahre
- 4 Jahre
- 5 Jahre
- 6 Jahre
- 7 Jahre
- 8 Jahre
- 9 Jahre
- 10 Jahre
- 11 Jahre
- 12 Jahre
- 13 Jahre
- 14 Jahre
- 15 Jahre
- Älter als 15 Jahre

F105 In welchem Bundesland arbeiten Sie?

- Baden-Württemberg
- Bayern
- Berlin
- Brandenburg
- Bremen

- Hamburg
- Hessen
- Mecklenburg-Vorpommern
- Niedersachsen
- Nordrhein-Westfalen
- Rheinland-Pfalz
- Saarland
- Sachsen
- Sachsen-Anhalt
- Schleswig-Holstein
- Thüringen

F106 In welchem Jahr Ihrer Weiterbildung befinden Sie sich derzeit?

- 1
- 2
- 3
- 4
- 5
- 6
- 7
- 8
- 9
- 10
- >10

F107 Was ist Ihr Karriereziel?

- Facharzt/Fachärztin im Krankenhaus
- Oberarzt/Oberärztin im Krankenhaus
- Chefarzt/Chefärztin im Krankenhaus
- Angestellter Facharzt/angestellte Fachärztin in der Niederlassung
- Selbstständiger Facharzt/selbstständige Fachärztin in der Niederlassung
- Akademische Laufbahn mit Habilitation/Professur
- Sonstiges (bitte angeben)

F108 Wo sind Sie derzeit primär eingesetzt?

- In der Klinik
- In der Praxis



F109 Wo im Krankenhaus sind Sie derzeit primär eingesetzt?

- Normalstation
- Intensivstation/ICU oder Rettungsstelle
- Funktionsbereich (z.B. Endoskopie, Sonographie etc.)
- Ambulanz
- Sonstiges (bitte angeben)

F110 In welcher Trägerschaft befindet sich das Krankenhaus, in dem Sie arbeiten?

- in öffentlicher Trägerschaft (z. B. städtisches Krankenhaus und die meisten Universitätskliniken)
- in freigemeinnütziger Trägerschaft (durch Kirchen oder Wohlfahrtsverbände betriebene Krankenhäuser wie z. B. DRK-Kliniken)
- in privater Trägerschaft (z. B. Helios-, Rhön-, Asklepios-, Sana-Kliniken usw.)
- Sonstiges (bitte angeben)

F111 Welcher Versorgungsstufe kann das Krankenhaus, in dem Sie arbeiten, am ehesten zugeordnet werden?

- Ich arbeite derzeit in einem Krankenhaus der Grund-, Regel- oder Schwerpunktversorgung.
- Ich arbeite derzeit in einem Krankenhaus der Maximalversorgung (kein Universitätsklinikum).
- Ich arbeite derzeit in einem Universitätsklinikum.
- Andere bzw. weiß nicht.

F112 Haben Sie Anmerkungen/Kritik zu unserer Umfrage? Haben wir Wichtiges vergessen oder zu oberflächlich behandelt? Wir freuen uns über jeden Hinweis!

[Freitext]

F113 Wir würden uns freuen, wenn Sie uns mitteilen, warum Sie sich für eine Weiterbildung in der Kinder- und Jugendmedizin entschieden haben.

[Freitext]
